# Supplementary material for: The rehydration transcriptome of the desiccation-tolerant bryophyte Tortula ruralis: transcript classification and analysis
Source: Springer Nature journal article supplement (doi:10.1186/1471-2164-5-89), 2004-11-16
Supplement: Additional file 1 [file 1471-2164-5-89-s1.doc]

| **KEGG biochemical pathway mappings for *Tortula* rehydration clusters** | | | |
| --- | --- | --- | --- |
| **Category** | **Pathway** | **#clusters** | **#of enzymes** |
|  | **Metabolism** |  |  |
| 1.1 Carbohydrate Metabolism |  |  |  |
| 1.1.1 | Glycolysis / Gluconeogenesis | 22 | 12 |
| 1.1.2 | Citrate cycle (TCA cycle) | 10 | 6 |
| 1.1.3 | Pentose phosphate pathway | 10 | 7 |
| 1.4 | Nucleotide sugars metabolism | 2 | 2 |
| 1.7.1 | Starch and sucrose metabolism | 16 | 9 |
| 1.7.5 | Aminosugars metabolism | 2 | 2 |
| 1.1.4 | Inositol metabolism | 10 | 3 |
| 1.1.5 | Pentose and glucuronate interconversions | 5 | 3 |
| 1.1.6 | Fructose and mannose metabolism | 10 | 8 |
| 1.1.7 | Galactose metabolism | 7 | 5 |
| 1.1.9 | Pyruvate metabolism | 19 | 9 |
| 1.1.10 | Glyoxylate and dicarboxylate metabolism | 8 | 5 |
| 1.1.11 | Propanoate metabolism | 7 | 6 |
| 1.1.12 | Butanoate metabolism | 10 | 5 |
| 1.1.1 | C5-Branched dibasic acid metabolism | 1 | 1 |
| 1.2 Energy Metabolism |  |  |  |
| 1.2.1 | Oxidative phosphorylation | 12 | 7 |
| 1.2.2 | ATP synthesis | 18 | 1 |
| 1.2.3 | Photosynthesis | 1 | 1 |
| 1.2.4 | Methane metabolism | 17 | 5 |
| 1.2.5 | Carbon fixation | 23 | 13 |
| 1.2.6 | Reductive carboxylate cycle (CO2 fixation) | 5 | 3 |
| 1.2.7 | Nitrogen metabolism | 17 | 8 |
| 1.2.8 | Sulfur metabolism | 2 | 2 |
| 1.3 Lipid Metabolism |  |  |  |
| 1.3.1 | Fatty acid biosynthesis (path 1) | 1 | 1 |
| 1.3.2 | Fatty acid biosynthesis (path 2) | 2 | 2 |
| 1.3.3 | Fatty acid metabolism | 6 | 5 |
| 1.3.4 | Synthesis and degradation of ketone bodies | 1 | 1 |
| 1.3.5 | Sterol biosynthesis | 4 | 4 |
| 1.3.6 | Bile acid biosynthesis | 2 | 2 |
| 1.8.1 | Glycerolipid metabolism | 13 | 8 |
| 1.8.3 | Inositol phosphate metabolism | 1 | 1 |
| 1.8.5 | Phospholipid degradation | 6 | 2 |
| 1.8.11 | Prostaglandin and leukotriene metabolism | 1 | 1 |
| 1.4 Nucleotide Mtabolism |  |  |  |
| 1.4.1 | Purine metabolism | 11 | 8 |
| 1.4.2 | Pyrimidine metabolism | 5 | 3 |
| 1.5 Amino Acid metabolism |  |  |  |
| 1.5.2 | Glutamate metabolism | 17 | 10 |
| 1.5.3 | Alanine and aspartate metabolism | 10 | 5 |
| 1.5.4 | Glycine, serine and threonine metabolism | 10 | 8 |
| 1.5.5 | Methionine metabolism | 9 | 5 |
| 1.5.6 | Cysteine metabolism | 3 | 2 |
| 1.5.7 | Valine, leucine and isoleucine degradation | 3 | 3 |
| 1.5.8 | Valine, leucine and isoleucine biosynthesis | 6 | 3 |
| 1.5.9 | Lysine biosynthesis | 1 | 1 |
| 1.5.10 | Lysine degradation | 4 | 2 |
| 1.5.11 | Arginine and proline metabolism | 6 | 4 |
| 1.5.12 | Histidine metabolism | 5 | 5 |
| 1.5.13 | Tyrosine metabolism | 14 | 7 |
| 1.5.14 | Phenylalanine metabolism | 13 | 5 |
| 1.5.15 | Tryptophan metabolism | 12 | 5 |
| 1.5.16 | Phenylalanine, tyr and tryp biosynthesis | 11 | 7 |
| 1.6 Metab of other Amino Acids |  |  |  |
| 1.6.1 | beta-Alanine metabolism | 5 | 2 |
| 1.6.2 | Taurine and hypotaurine metabolism | 4 | 2 |
| 1.6.3 | Aminophosphonate metabolism | 2 | 1 |
| 1.6.4 | Selenoamino acid metabolism | 8 | 5 |
| 1.6.5 | Cyanoamino acid metabolism | 3 | 1 |
| 1.6.7 | D-Arginine and D-ornithine metabolism | 3 | 1 |
| 1.6.9 | Glutathione metabolism | 11 | 5 |
| 1.7 Glycan Biosynthesis and metab |  |  |  |
| 1.7.2 | N-Glycans biosynthesis | 3 | 2 |
| 1.7.7 | Chondroitin / Heparan sulfate biosynthesis | 1 | 1 |
| 1.7.8 | Keratan sulfate biosynthesis | 0 | 0 |
| 1.7.9 | Lipopolysaccharide biosynthesis | 4 | 3 |
| 1.7.10 | Peptidoglycan biosynthesis | 1 | 1 |
| 1.8 Metab of Cofactors and vitamins |  |  |  |
| 1.9.1 | Ubiquinone biosynthesis | 5 | 2 |
| 1.9.2 | One carbon pool by folate | 6 | 4 |
| 1.9.4 | Riboflavin metabolism | 1 | 1 |
| 1.9.5 | Vitamin B6 metabolism | 3 | 3 |
| 1.9.6 | Nicotinate and nicotinamide metabolism | 1 | 1 |
| 1.9.7 | Pantothenate and CoA biosynthesis | 4 | 3 |
| 1.9.9 | Folate biosynthesis | 1 | 1 |
| 1.9.11 | Porphyrin and chlorophyll metabolism | 25 | 9 |
| 1.9 Biosyn of Secondary metabolites |  |  |  |
| 1.10.5 | Streptomycin biosynthesis | 2 | 2 |
| 1.10.6 | Erythromycin biosynthesis | 4 | 2 |
| 1.10.7 | Terpenoid biosynthesis | 3 | 3 |
| 1.10.8 | Flavonoids, stilbene and lignin biosynthesis | 13 | 5 |
| 1.10.9 | Alkaloid biosynthesis I | 2 | 1 |
| 1.10.10 | Alkaloid biosynthesis II | 6 | 1 |
| 1.10 Biodegredation of Xenobiotics |  |  |  |
| 1.11.2 | gamma-Hexachlorocyclohexane degradation | 1 | 1 |
| 1.11.3 | Benzoate degradation via hydroxylation | 1 | 1 |
| 1.11.7 | Tetrachloroethene degradation | 4 | 1 |
| 1.11.13 | Benzoate degradation via CoA ligation | 1 | 1 |
| 1.11.16 | Styrene degradation | 2 | 2 |
| 1.11.18 | Caprolactam degradation | 2 | 1 |
|  | **Genetic Information Processing** |  |  |
| 2.1 Transcription |  |  |  |
| 2.1.1 | RNA polymerase | 3 | 1 |
| 2.2 Translation |  |  |  |
| 2.2.3 | Aminoacyl-tRNA biosynthesis | 6 | 5 |
| 2.3 Sorting and Degredation |  |  |  |
| 2.3.2 | Type II secretion system | 2 | 2 |
| 2.3.3 | Type III secretion system | 18 | 1 |
| 2.3.6 | Ubiquitin mediated proteolysis | 9 | 1 |
| 2.3.7 | Proteasome | 5 | 1 |
| 2.4 Replication and Repair |  |  |  |
| 2.4.2 | Replication complex | 2 | 1 |
| 2.4.3 | Other factors | 2 | 1 |
|  | **Environmental Information Processing** |  |  |
| 3.2 Signal Transduction |  |  |  |
| 3.2.1 | Two-component system | 1 | 1 |
| 3.2.4 | Phosphatidylinositol signaling system | 2 | 2 |
| 3.6.1 | ATPases | 3 | 2 |
|  | **Cellular Processes** |  |  |
| 4.1 Cell motility |  |  |  |
| 4.1.2 | Flagellar assembly | 18 | 1 |
| 4.2 Cell Growth and Death |  |  |  |
| 4.2.1 | Cell cycle | 19 | 3 |
| 4.5 Behavior |  |  |  |
| 4.5.1 | Circadian rhythm | 9 | 1 |
|  | **KEGG categories not represented** |  |  |
|  | **Metabolism** |  |  |
| 1.1 | Ascorbate and aldarate metabolism | 0 | 0 |
| 1.3 | C21-Steroid hormone metabolism | 0 | 0 |
|  | Androgen and estrogen metabolism | 0 | 0 |
| 1.5 | Urea cycle and metabolism of amino groups | 0 | 0 |
| 1.6 | D-Glutamine and D-glutamate metabolism | 0 | 0 |
|  | D-Alanine metabolism | 0 | 0 |
| 1.7 | O-Glycans biosynthesis | 0 | 0 |
|  | N-Glycan degradation | 0 | 0 |
|  | Glycosaminoglycan degradation | 0 | 0 |
|  | Keratan sulfate biosynthesis | 0 | 0 |
|  | GPI-anchor biosynthesis | 0 | 0 |
|  | Sphingophospholipid biosynthesis | 0 | 0 |
|  | Sphingoglycolipid metabolism | 0 | 0 |
|  | Blood group glycolipid biosynthesis | 0 | 0 |
|  | Globoside metabolism | 0 | 0 |
|  | Ganglioside biosynthesis | 0 | 0 |
| 1.8 | Thiamine metabolism | 0 | 0 |
|  | Biotin metabolism | 0 | 0 |
|  | Retinol metabolism | 0 | 0 |
| 1.9 | Puromycin biosynthesis | 0 | 0 |
|  | Tetracycline biosynthesis | 0 | 0 |
|  | Penicillins and cephalosporins biosynthesis | 0 | 0 |
|  | Clavulanic acid biosynthesis | 0 | 0 |
|  | Indole and ipecac alkaloid biosynthesis | 0 | 0 |
|  | 1,1,1-Trichloro-2,2-bis(4-chlorophenyl)ethane (DDT) degradation | 0 | 0 |
| 1.1 | Biphenyl degradation | 0 | 0 |
|  | Toluene and xylene degradation | 0 | 0 |
|  | 2,4-Dichlorobenzoate degradation | 0 | 0 |
|  | Nitrobenzene degradation | 0 | 0 |
|  | 1,4-Dichlorobenzene degradation | 0 | 0 |
|  | Fluorene degradation | 0 | 0 |
|  | Carbazole degradation | 0 | 0 |
|  | 1,2-Dichloroethane degradation | 0 | 0 |
|  | 3-Chloroacrylic acid degradation | 0 | 0 |
|  | Ethylbenzene degradation | 0 | 0 |
|  | Atrazine degradation | 0 | 0 |
|  | **Genetic Information Processing** |  |  |
| 2.1 | Basal transcription factors | 0 | 0 |
|  | HTH family transcriptional regulators | 0 | 0 |
|  | Other and unclassified family transcriptional regulators | 0 | 0 |
|  | Spliceosome | 0 | 0 |
| 2.2 | Ribosome | 0 | 0 |
|  | Translation factors | 0 | 0 |
|  | Other translation factors | 0 | 0 |
| 2.3 | Protein export | 0 | 0 |
|  | Type IV secretion system | 0 | 0 |
| 2.4 | RNA degradosome | 0 | 0 |
|  | DNA polymerase | 0 | 0 |
|  | **Environmental Information Processing** |  |  |
| 3.1 | ABC transporters, prokaryotic | 0 | 0 |
|  | ABC transporters, ABC-2 and other types | 0 | 0 |
|  | ABC transporters, eukaryotic | 0 | 0 |
|  | Major facilitator superfamily (MFS) | 0 | 0 |
|  | Other ion-coupled transporters | 0 | 0 |
|  | Pores ion channels | 0 | 0 |
|  | Other transporters | 0 | 0 |
| 3.2 | Phosphotransferase system (PTS) | 0 | 0 |
|  | MAPK signaling pathway | 0 | 0 |
|  | Second messenger signaling pathway | 0 | 0 |
| 3.3 | G-protein coupled receptors | 0 | 0 |
|  | Ion channel receptors | 0 | 0 |
|  | **Cellular Processes** |  |  |
| 4.2 | Apoptosis | 0 | 0 |
| 4.3 | Integrin-mediated cell adhesion | 0 | 0 |
|  | Cadherin-mediated cell adhesion | 0 | 0 |
| 4.4 | Wnt signaling pathway | 0 | 0 |
|  | Notchsignaling pathway | 0 | 0 |
|  | Dorso-ventral axis formation | 0 | 0 |
|  | **KEGG Categories Eliminated** |  |  |
| 5.1 | **Human Diseases** |  |  |
